# Supplementary material for: Morphological and orientational diversity of LiFePO4crystallites: remarkable reaction path dependence in hydrothermal/solvothermal syntheses
Source: Royal Society of Chemistry journal article supplement (doi:10.1039/c4ce01397b), 2014-01-01
Supplement: c4ce01397b1.pdf [file c4ce01397b1.pdf]

Supporting Information for

**Morphological and Orientational Diversity of LiFePO<sub>4</sub> Crystallites:  
Remarkable Reaction Path Dependence in  
Hydrothermal/Solvothermal Syntheses**

Zhaojin Li,<sup>†,§</sup> Kongjun Zhu,<sup>‡</sup> Jialin Li<sup>†</sup>, and Xiaohui Wang<sup>†,\*</sup>

<sup>†</sup>Shenyang National Laboratory for Materials Science, Institute of Metal Research, Chinese Academy of Sciences, 72 Wenhua Road, Shenyang 110016, China

<sup>‡</sup>State Key Laboratory of Mechanics and Control of Mechanical Structures, Nanjing University of Aeronautics and Astronautics, Nanjing 210016, China

<sup>§</sup>University of Chinese Academy of Sciences, Beijing 100039, China

### S.1. Transformation from $\text{Li}_3\text{PO}_4$ to $\text{LiFePO}_4$ (LFP) indicated by Raman Spectroscopy

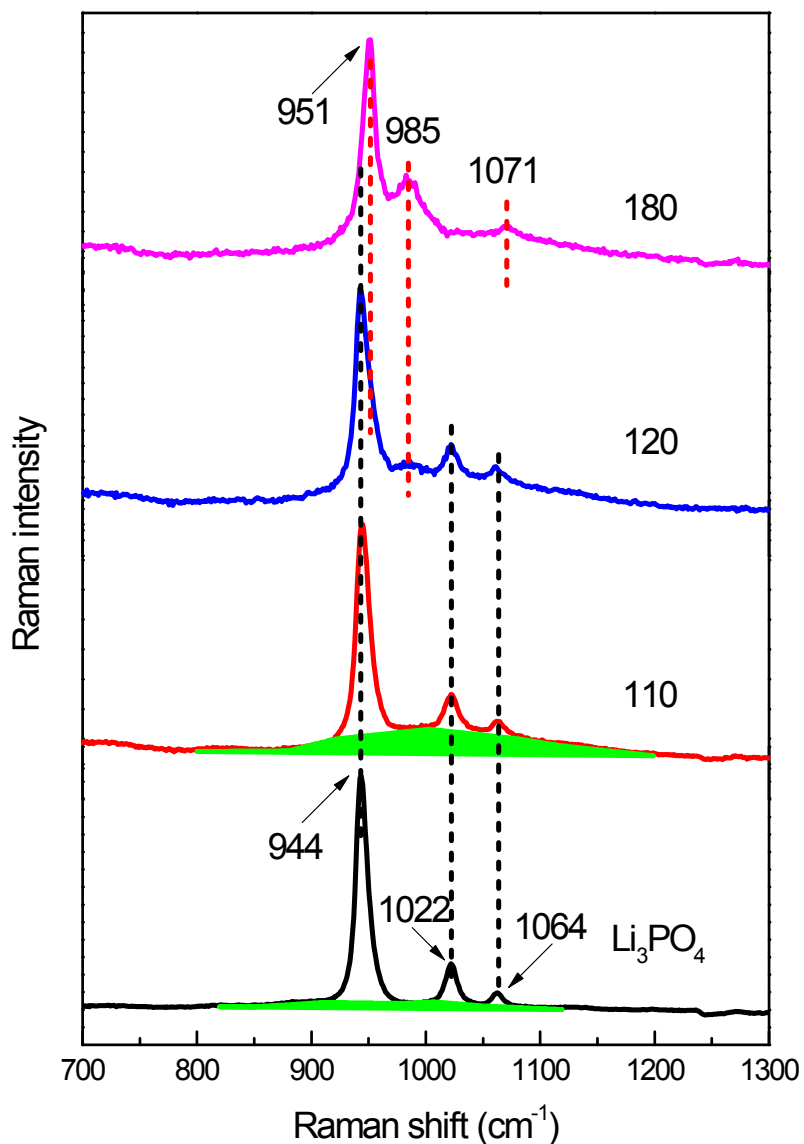

**Figure S1.** Raman spectra of  $\text{Li}_3\text{PO}_4$  and those heated at various temperatures under the S-UR condition, indicating the presence of a profound background for the sample (S-UR-(110)). This background is an indicator of amorphization during the in situ transformation of  $\text{Li}_3\text{PO}_4$  to LFP. Black dashed lines and the red ones correspond to the Raman bands of  $\text{Li}_3\text{PO}_4$  and LFP, respectively.

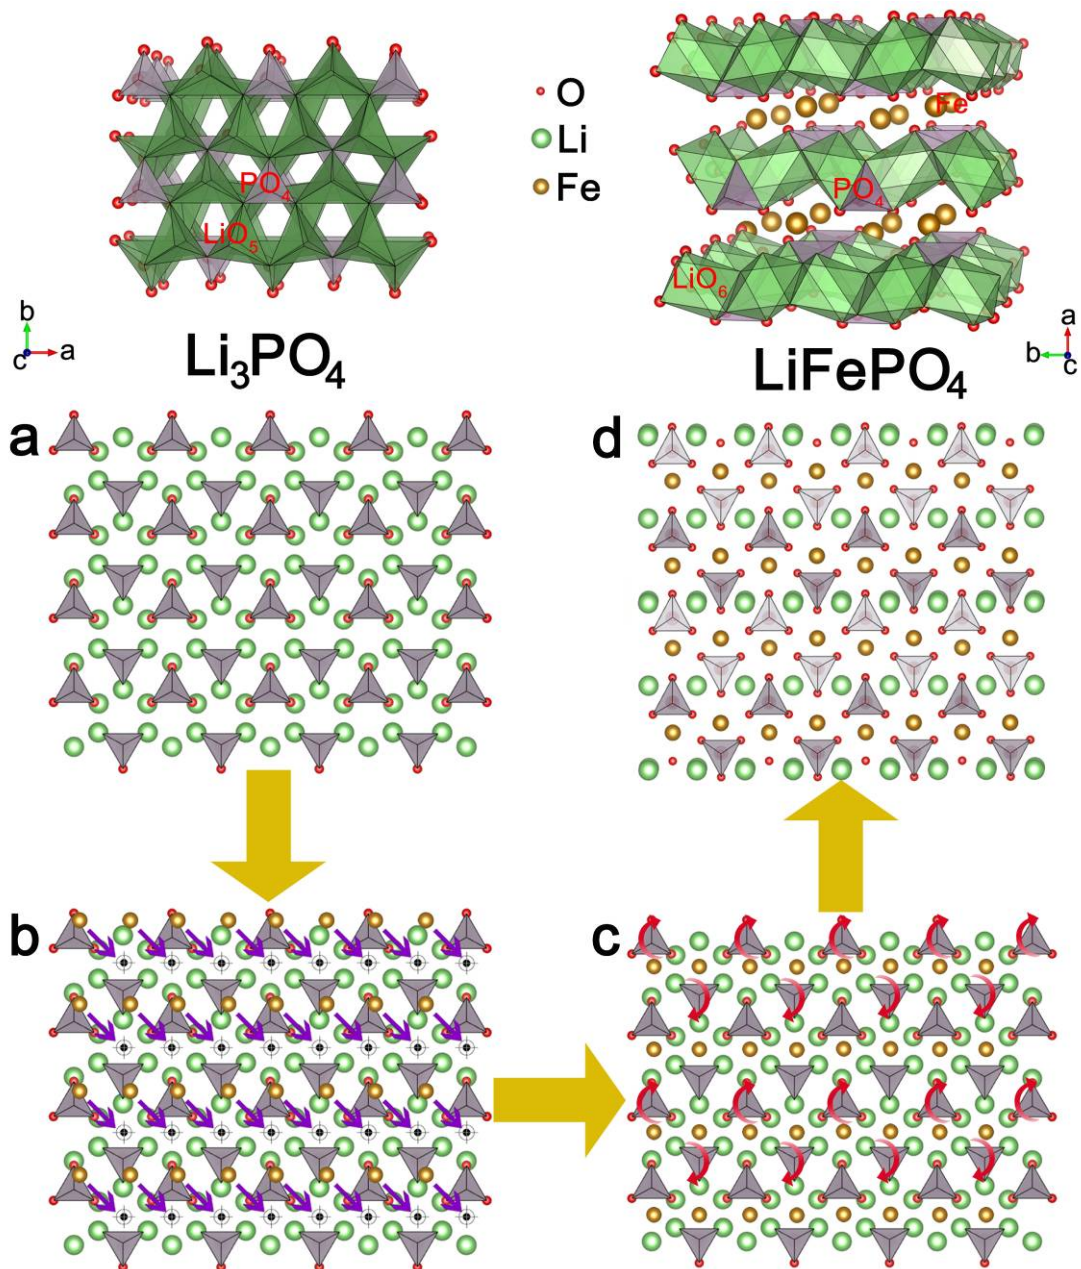

**Figure S2.** Schematic illustration showing the transformation from  $\text{Li}_3\text{PO}_4$  to LFP. In the crystal of  $\text{Li}_3\text{PO}_4$ , each  $\text{PO}_4$  tetrahedron is surrounded by nine  $\text{LiO}_5$  hexahedra of which three are edging-sharing and six are corner-sharing. LFP crystallizes in the olivine structure. It is built up of  $\text{PO}_4$  tetrahedra, with the  $\text{Fe}^{2+}$  cations occupying corner-shared octahedral positions, and the  $\text{Li}^+$  cations located in chains of edge-sharing octahedra. Due to the difference in configuration of  $\text{PO}_4$  tetrahedra in  $\text{Li}_3\text{PO}_4$  and LFP, transition of  $\text{Li}_3\text{PO}_4$  into LFP involves the reposition of  $\text{PO}_4$  tetrahedra upon the incorporation of  $\text{Fe}^{2+}$  cations. The reposition predominantly includes the rotation of the  $\text{PO}_4$  tetrahedra that are the skeleton of  $\text{Li}_3\text{PO}_4$ . As a result, the crystal of  $\text{Li}_3\text{PO}_4$  collapsed, giving rise to an amorphization process, as indicated by the Raman spectra (Figure S1). With the reconstruction as shown in Figure S2 c, the structure of LFP is established.

**S.2. XRD patterns of the intermediate phases by using ethanol, glycerol and polyethylene glycol 200 as solvents.**

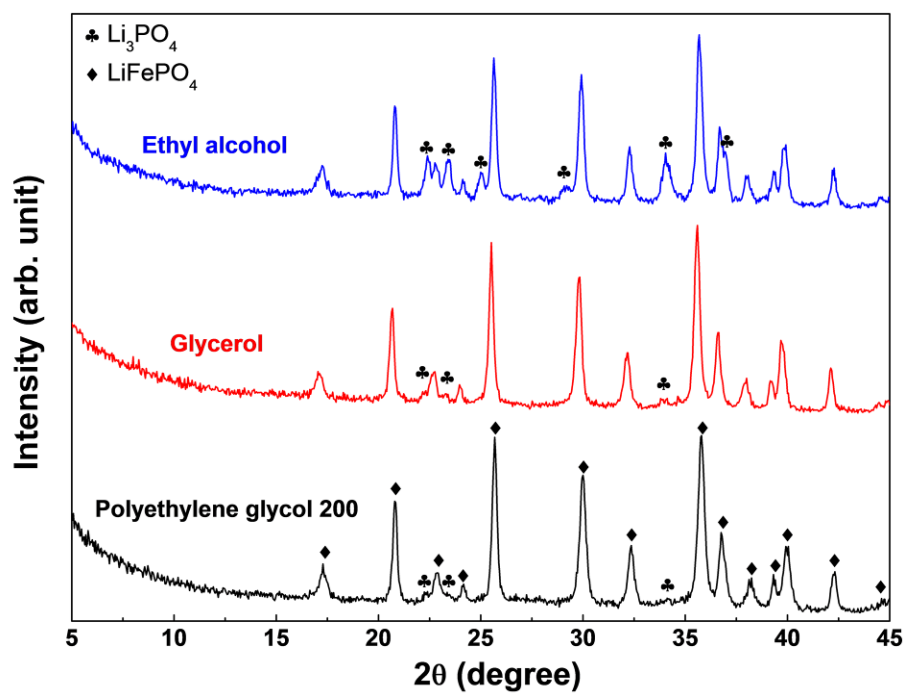

**Figure S3.** XRD patterns of samples heated up to 120 °C using ethanol, glycerol and polyethylene glycol 200 as solvents. Note that no other phases but  $\text{Li}_3\text{PO}_4$  and LFP are identified.

### S.3. Electrochemical Performance.

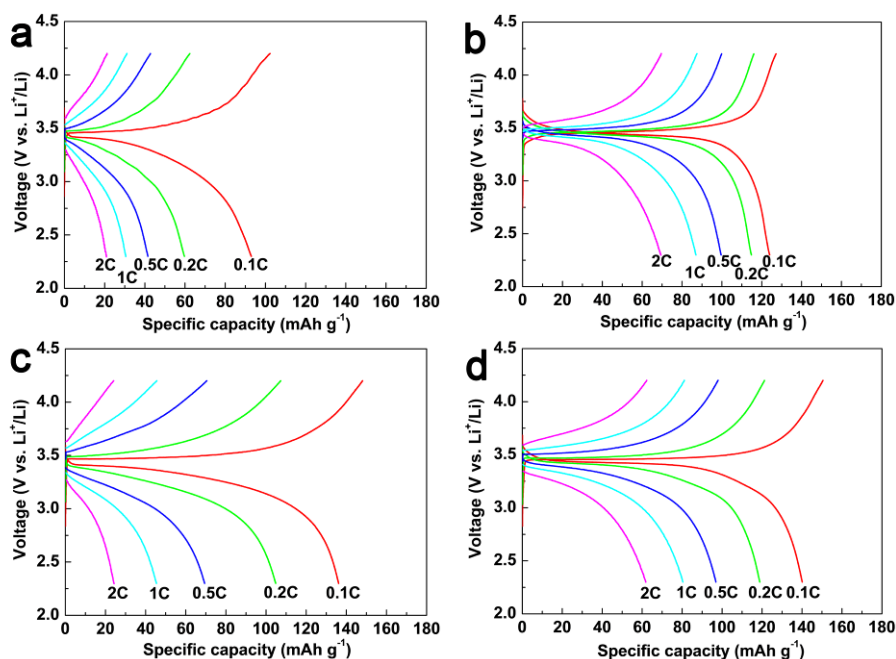

**Figure S4.** Electrochemical performances of bare LFP particles. The electrodes were prepared by mixing 80 wt% bare LFP, 15 wt% acetylene black, and 5 wt% poly(vinylidene fluoride). (a) H-UR (LFP), the electrode delivers a specific capacity of ca. 93.0, 59.7, 41.5, 30.5 and 20.9 mA h g<sup>-1</sup> at 0.1, 0.2, 0.5, 1 and 2 C, respectively. (b) S-UR (LFP), the electrode delivers a specific capacity of ca. 124.0, 114.8, 99.6, 87.0 and 69.4 mA h g<sup>-1</sup> at 0.1, 0.2, 0.5, 1 and 2 C, respectively. (c) H-EP (LFP), the electrode delivers a specific capacity of ca. 136.2, 104.8, 69.4, 45.4 and 24.3 mA h g<sup>-1</sup> at 0.1, 0.2, 0.5, 1 and 2 C, respectively. (d) S-EP (LFP), the electrode delivers a specific capacity of ca. 140.1, 118.9, 96.9, 80.4 and 61.6 mA h g<sup>-1</sup> at 0.1, 0.2, 0.5, 1 and 2 C, respectively.

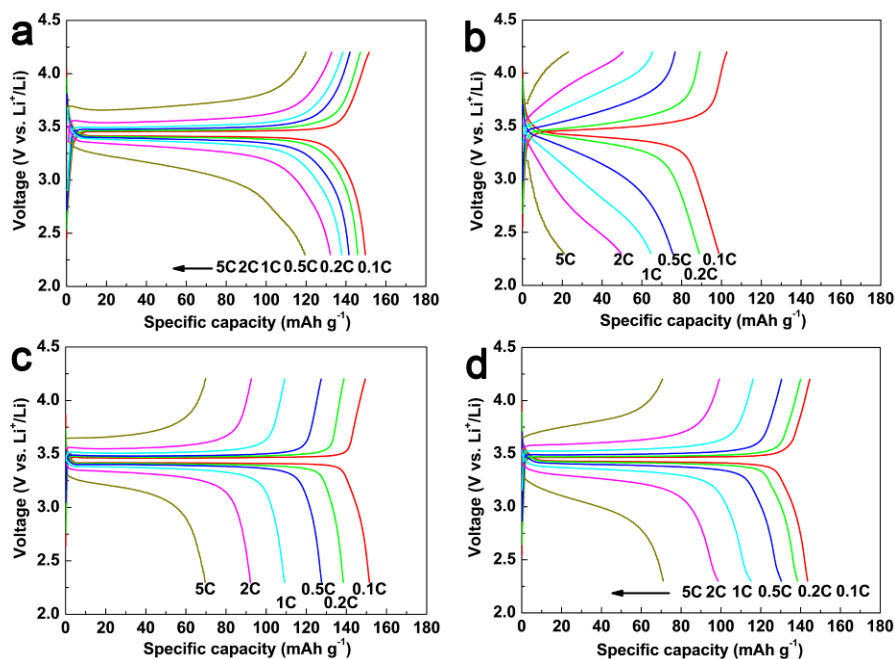

**Figure S5.** Electrochemical performances of LFP/C composites in the absence of conducting agent (acetylene black). The electrodes were prepared by mixing 90 wt% cathode composite, 10 wt% poly(vinylidene fluoride). (a) H-UR (LFP/C), the electrode delivers a specific capacity of ca. 149.7, 145.9, 141.5, 137.9, 132.1 and 119.4 mA h g<sup>-1</sup> at 0.1, 0.2, 0.5, 1, 2 and 5 C, respectively. (b) S-UR (LFP/C), the electrode delivers a specific capacity of ca. 98.7, 88.9, 75.5, 64.3, 49.7 and 21.2 mA h g<sup>-1</sup> at 0.1, 0.2, 0.5, 1, 2 and 5 C, respectively. (c) H-EP (LFP/C), the electrode delivers a specific capacity of ca. 151.5, 138.5, 127.7, 109.2, 92.2 and 69.6 mA h g<sup>-1</sup> at 0.1, 0.2, 0.5, 1, 2 and 5 C, respectively. (d) S-EP (LFP/C), the electrode delivers a specific capacity of ca. 143.5, 138.4, 130.4, 115.1, 98.6 and 71 mA h g<sup>-1</sup> at 0.1, 0.2, 0.5, 1, 2 and 5 C, respectively.

#### S.4. SEM images of the LFP/C composites.

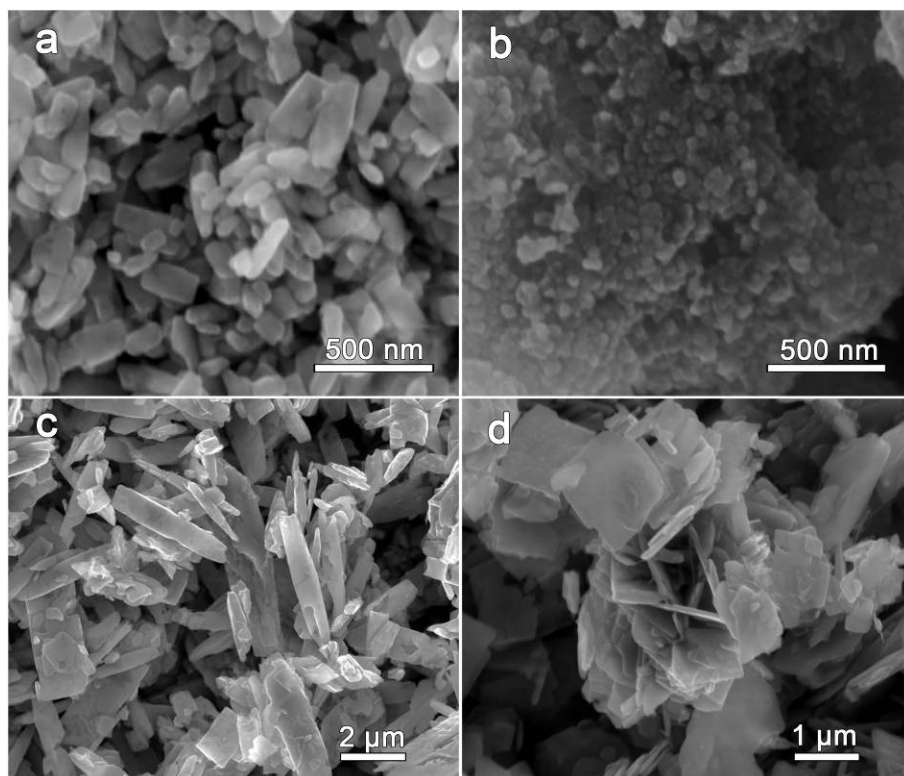

**Figure S6.** SEM images of the LFP/C composites, indicating that the morphologies of the synthesized LFP crystallites are well preserved with carbon coating at 650 °C. (a) H-UR (LFP/C), (b) S-UR (LFP/C), (c) H-EP (LFP/C), and (d) S-EP (LFP/C)

### S.5. FTIR spectra of the LFP/C composites.

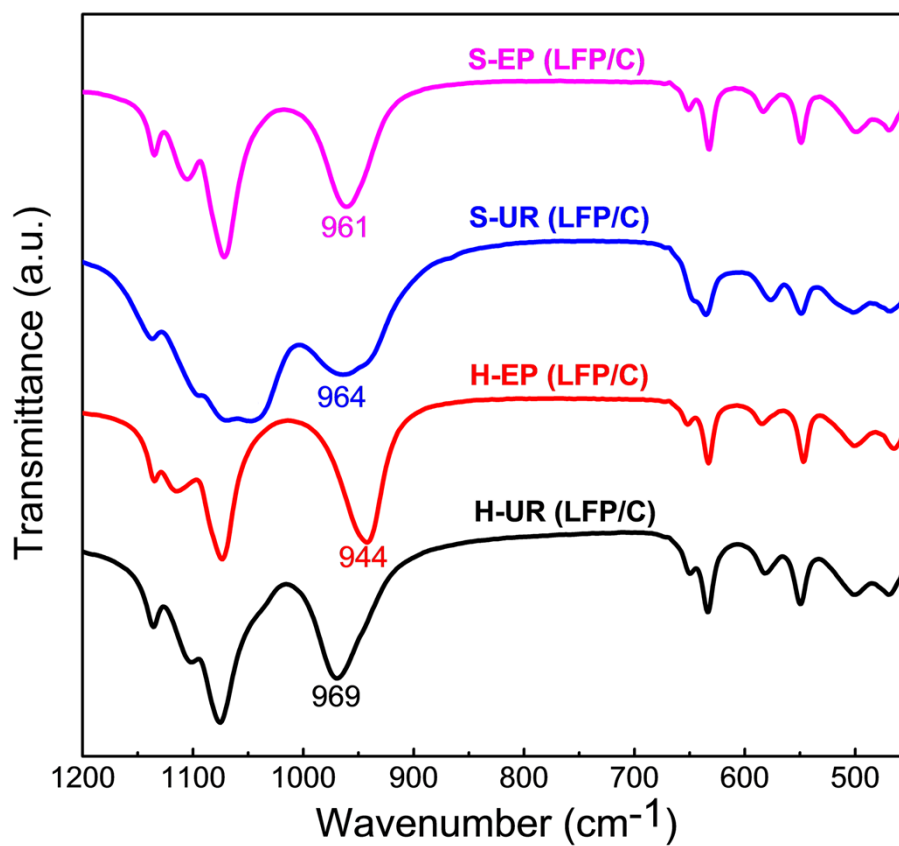

**Figure S7.** FTIR spectra of the LFP/C composites.
